# Supplementary material for: Removal of Aqueous Para-Aminobenzoic Acid Using a Compartmental Electro-Peroxone Process
Source: MDPI journal article supplement (doi:10.3390/w13212961), 2021-10-20
Supplement: s1 [file s1]

Archive with 1 entries (1 files):
- water-1419244-supplementary.pdf
